30

31 **Abstract**

32 It has been well-documented that some amino acid mutations in hemagglutinin  
33 (HA) of H9N2 avian influenza virus (H9N2 virus) alter the viral antigenicity, but little  
34 is reported about the role of antibody escape mutations in escape vaccine antibodies.  
35 In this study, we found that the evolution of F/98 strain in chicken embryos or  
36 chickens resulted in significant differences in immune escape, and identify the  
37 contribution of HA mutations to the antigenic variation and immune escape of H9N2  
38 virus. Among amino acid mutations in the HA of the antigen variant viruses occurring  
39 in embryonated chicken eggs and/or chickens with or without the selection pressure of  
40 vaccine antibodies, the mutations, S145N, Q164L, A168T, A198V, M224K and  
41 Q234L, affect the antigen drift of H9N2 virus. Specially, the A198V mutation, located  
42 at the receptor-binding site on the head domain of HA, significantly contributed the  
43 antigenic variation of H9N2 virus. The mutation A198V or Q234L significantly  
44 improved the receptor binding activity, while S145N mutation decreased the receptor  
45 binding activity. Single S145N mutation could promote viral escape from polyclonal  
46 antibodies (pAbs) by preventing Ab binding physically, and single A198V mutation  
47 could promote viral escape from pAbs by enhancing the receptor binding activity.  
48 Additionally, either the mutation S145N or A198V did interfere with the  
49 immunogenicity of the inactivated vaccine, resulting in reduction of the protective  
50 efficiency of H9N2 inactivated vaccine, which contributed escape from the  
51 antibody-based immunity. Our findings provided an important reference for the  
52 accurate evaluation of the role of the amino acids mutation in HA affecting the  
53 antigenicity of H9N2 virus on immune escape, and delivered a new perspective for  
54 monitoring the adaptive evolution of H9N2 virus.

55

56

57 **Importance**

58 In this study, the role of the HA mutations of H9N2 virus occurring with and  
59 without antibody selective pressure on escaping from the antibody-based immune  
60 response in host was analyzed. The results demonstrated that (i) the HA mutations

61 S145N, Q164L, A168T, A198V, M224K, and Q234L occurring in the process of the  
62 adaptive evolution of H9N2 virus in embryonated chicken eggs and/or chickens could  
63 affect the antigenic variation of H9N2 virus. Among these mutations, the HA mutation  
64 A198V had the most significant effect on the antigenic variation; (ii) S145N mutation  
65 promoted viral escape from pAbs by preventing Abs binding physically; (iii) A198V  
66 mutation did promote viral escape from pAbs by enhancing the receptor binding  
67 activity; (iv) neither the HA mutation S145N or A198V interfered with the  
68 immunogenicity of the inactivated vaccine, resulting in reduction of the protective  
69 efficiency of H9N2 inactivated vaccine.

70

### 71 **Keywords**

72 H9N2, avian influenza virus, antibody selective pressure, immune escape,  
73 haemagglutinin, mutations

74

75

### 76 **Introduction**

77 H9N2 avian influenza virus (AIV) spread rapidly and infected more than 90% of  
78 chicken flocks since its breakout in Hebei province, China in 1998. It became one of  
79 the most important epidemics in poultry industry in China (1). Since then, vaccination  
80 strategy of inactivated vaccine for control of H9N2 avian influenza had been  
81 extensively executed, and worked well for a long period (2). However, H9N2 virus is  
82 undergoing adaptive evolution under the vaccine immune pressure. As a major  
83 antigen and receptor binding protein of H9N2 virus, the haemagglutinin (HA) from  
84 the circulating field strains were clustered into three lineages before 2007,  
85 A/Chicken/Beijing/1/94-like (BJ/94-like), A/Quail/Hong Kong/G1/97-like (G1-like),  
86 and A/Duck/Hong Kong/Y439/97-like (Y439/97-like) (3). In 2013, G57 strains were  
87 emerged as a predominant genotype of H9N2 virus. A new genotype G118 was  
88 discovered in 2015 (4). With the evolution of H9N2 virus, the specific antibodies  
89 induced by inactivated vaccine could not effectively block the attachment of HA of  
90 the circulating virus to the target cells (5). This resulted in the decrease in the

91 protection efficacy of the existing vaccines and isolation of breakthrough H9N2  
92 viruses isolated in vaccinated chicken flocks with high antibody titer (6). Therefore, it  
93 is important to monitor antigenic mutation of the HA of H9N2 virus.

94 Currently, over 30 antigenic sites of H9N2 virus have been reported (7-13). In  
95 these studies, most of mutations on the antigenic sites of HA were gained by  
96 monoclonal antibody (mAb) precisely, which promoted virus to escape from mAb  
97 neutralization by changing virus-Ab binding. Naturally, the occurrence of antigenic  
98 drift of HA is determined by several factors, such as environment, genetic background,  
99 and immune status. The immune selective pressure and natural selection could also  
100 drive HA mutation on antigenic sites to escape neutralizing antibody by adding  
101 N-linked glycosylation (NLG) for shielding the antigenic sites (14, 15), changing  
102 virus-antibody binding property (16), or altering receptor-binding specificity (17-20).

103 We previously reported that the H9N2 vaccine representative strain  
104 A/Chicken/Shanghai/F/1998 (F/98, H9N2), which belonged to BJ/94-like lineage,  
105 occurred antigenic variation continually when passaged in specific pathogen-free  
106 (SPF) chicken embryos or SPF chickens with or without homologous vaccine  
107 antibodies (21, 22). In order to identify the contribution of HA mutations to the  
108 antigenic variation and immune escape of H9N2 virus, recombinant viruses  
109 containing single HA mutation or multiple HA mutations which might affect the  
110 antigenic variants of F/98 strains in F/98 backbone were generated to define the role  
111 of HA mutations of F/98 strain passaged under the selection pressure with or without  
112 homologous vaccine antibodies in immune escape. We found that the evolution of  
113 F/98 strain in chicken embryos or chickens resulted in significant differences in  
114 immune escape. The results showed that the HA mutations under the selection  
115 pressure with or without vaccine antibodies, including S145N, Q164L, A168T,  
116 M224K and Q234L, had some effect on the antigenic drift of H9N2 virus, and the HA  
117 mutation A198V significantly affected the antigenic variation. Although the virus  
118 possessing the HA mutation S145N or A198V escaped from the pAbs-neutralization  
119 reaction, the molecular mechanism of antibody neutralization was different between  
120 the mutations S145N and A198V, S145N mutation promoted viral escape from pAbs

121 by preventing Abs binding physically, whereas A198V mutation by enhancing the  
122 receptor binding activity. Additionally, each of the mutations S145N and A198V  
123 interfered with the immunogenicity of the inactivated vaccine, resulting in reduction  
124 of the protective efficiency of H9N2 inactivated vaccine, which contributed escape  
125 from the antibody-based immunity.

126

## 127 **Results**

### 128 **The adaptive evolution of H9N2 virus in SPF embryonated chicken eggs or SPF** 129 **chickens drove different immune escape.**

130 We previously reported that antigenic drift of the passaged virus occurred when  
131 the F/98 strain passaged continuously in the 47<sup>th</sup> generation under selective pressure  
132 from vaccine antibodies and in the 52<sup>nd</sup> generation without selective pressure from  
133 vaccine antibodies in SPF embryonated chicken eggs (21). The second-generation  
134 quasispecies of F/98 strain under selection pressure from vaccine antibodies had  
135 undergone 100% antigenic variation in SPF chickens, while after passaging to the  
136 fifth generation without selection pressure from vaccine antibodies, only 30-40% of  
137 the quasispecies displayed antigen drift (22). The antigenic variant evF47, the 47<sup>th</sup>  
138 generation under vaccine antibodies in SPF chicken embryonated eggs, has mutations  
139 K131R, S145N, G181E and A198V in HA. The antigenic variant enF52, the 52<sup>nd</sup> SPF  
140 embryonated chicken eggs SPF embryonated chicken eggs generation without vaccine  
141 antibodies in SPF embryonated chicken eggs, also has same mutations K131R, S145N,  
142 G181E and A198V in HA. The antigenic variant cvF20, the 20<sup>th</sup> generation with  
143 vaccine antibodies in SPF chicken, has mutations K131R, A198V and Q234L in HA.  
144 The antigenic variant cnF20, the 20<sup>th</sup> generation without vaccine antibodies in SPF  
145 chicken, has mutations A168T, A198V and M224K in HA. The above 4 strains were  
146 the first antigenic variants, whose genome were still stable after 3 generations of  
147 embryos blind passage, and used to determine the role of HA mutations in escaping  
148 from antibody-based immune responses with different selection pressures or different  
149 models with F/98 strain as a control. SPF chickens immunized by oil-emulsion of  
150 inactive whole virus vaccine of F/98 strain were challenged with each of antigenic

151 variants. The virus shedding was detected in tracheal swabs from chickens to analyze  
152 the differences in immune escape. The results showed that 100% of SPF chickens (6/6)  
153 immunized with F/98 vaccine shed viruses at 3 days after challenge with the virus  
154 evF47 or enF52; 66.7% of chickens (4/6) shed virus cvF20; 16.7% of chickens (1/6)  
155 shed virus cnF20 (Figure 1). These results revealed that the adaptive evolution of  
156 H9N2 virus between embryonated chicken eggs and chickens drove different immune  
157 escape, and indicated that the contribution of HA mutations from the above antigenic  
158 variants to antigenic drift and immune escape might also be different.

### 159 **HA mutations of F/98 strain under selection pressure played different roles in the** 160 **antigenic variation**

161 The passaged viruses evF47 and enF52 possessed the same mutations in HA.  
162 The S145N mutation located adjacent to the receptor-binding sites, the A198V  
163 mutation located at the receptor-binding sites, and the mutations K131R and G181E  
164 located in the HA globular domain (Figure 2A). In order to evaluate the role of these  
165 mutations, 9 recombinant viruses containing single or multiple HA mutations from the  
166 viruses evF47 and enF52 in F/98 backbone were generated, respectively, including  
167 rF/HA<sub>K131R</sub>, rF/HA<sub>S145N</sub>, rF/HA<sub>G181E</sub>, rF/HA<sub>A198V</sub>, rF/HA<sub>348</sub> (K131R+S145N+G181E),  
168 rF/HA<sub>349</sub> (K131R+S145N+A198V), rF/HA<sub>389</sub> (K131R+ G181E +A198V), rF/HA<sub>489</sub>  
169 (S145N+G181E+A198V), and rF/HA<sub>47</sub> (K131R+S145N+G181E+A198V) (Table 1).  
170 The serum against the paternal virus F/98 in chickens was used as the reference serum  
171 to analyze the antigenicity of the recombinant viruses by HI assay. Compared with the  
172 paternal virus F/98, the mutations K131R and G181E did not affect the readouts of HI  
173 titer, the viruses rF/HA<sub>S145N</sub> and rF/HA<sub>348</sub> exhibited 1.67-fold lower HI titers, and the  
174 viruses rF/HA<sub>A198V</sub>, rF/HA<sub>349</sub>, rF/HA<sub>389</sub>, rF/HA<sub>489</sub> and rF/HA<sub>47</sub> displayed 6.67-fold  
175 lower HI titers, which were antigenically distinct from F/98 (Figure 2B). These results  
176 suggested that the mutations S145N and A198V were related to the change of the  
177 antigenicity of H9N2 virus, and the contribution of mutation A198V to the antigenic  
178 drift of F/98 strain was significantly more than that of the mutation S145N.

179 In the process of F/98 strain continuously passaged in chickens, 390  
180 quasispecies were isolated when F/98 strain was passaged for 20 generations in

181 chickens, and 13 HA mutations were identified, including K131R, Q133H, Q164L,  
182 A168T, A198V, M224K, Q234L, Y264H, G270R, G274R, K278E, I386V and  
183 K399N (22). The mutation A198V was located at receptor-binding sites, Q164L was  
184 next to receptor-binding sites, Q234L was located in the right edge of the  
185 receptor-binding pocket, the mutations A168T and M224K were around the  
186 receptor-binding sites, and the other HA mutations except for K278E, I386V and  
187 K399N were all located in the HA globular domain (Figure. 2A). Then, 13  
188 recombinant viruses containing single HA mutation in F/98 backbone were generated  
189 (Table 1) and were tested for their antigenicity against anti-F/98 serum using HI assay.  
190 Eight recombinant viruses, rF/HA<sub>K131R</sub>, rF/HA<sub>Q133H</sub>, rF/HA<sub>Y264H</sub>, rF/HA<sub>G270R</sub>,  
191 rF/HA<sub>G274R</sub>, rF/HA<sub>K278E</sub>, rF/HA<sub>I386V</sub> and rF/HA<sub>K399N</sub>, had similar antigenicity to the  
192 paternal virus F/98. Three recombinant viruses, rF/HA<sub>Q164L</sub>, rF/HA<sub>A168T</sub> and  
193 rF/HA<sub>M224K</sub>, exhibited 1.67-fold lower HI titers to the anti-F/98 serum. The virus  
194 rF/HA<sub>A198V</sub> exhibited 6.67-fold lower HI titers (a change of more than 4-fold) to the  
195 anti-F/98 serum, which is an indication of antigenically distinct from F/98. The virus  
196 rF/HA<sub>Q234L</sub> displayed 1.2-fold higher HI titer to the anti-F/98 serum (Figure. 2C).  
197 These results suggested that the mutations Q164L, A168T, A198V, M224K and  
198 Q234L were related to antigenic variation.

199 In conclusion, the mutations S145N, Q164L, A168T, A198V, M224K and  
200 Q234L in the HA occurred in embryonated chicken eggs or chickens with or without  
201 the selection pressure resulted in antigenic drift of F/98 strain. Among these mutations,  
202 the mutation A198V at the receptor binding site of HA significantly promoted the  
203 antigenic drift.

#### 204 **HA mutations have unequal effects on the receptor binding avidity**

205 Because the mutations S145N, Q164L, A168T, A198V, M224K and Q234L  
206 affecting the antigenicity of F/98 strain were all around the receptor binding sites of  
207 HA, we hypothesized that these mutations might alter the receptor binding avidity or  
208 the interaction between the virus and the receptor on the surface of the chicken red  
209 blood cells. The results showed that the virus cvF20, rF/HA<sub>A198V</sub> and rF/HA<sub>Q234L</sub>  
210 bound to chicken erythrocytes treated with 32-fold higher  $\alpha$ 2-3,6,8 neuraminidase

211 concentrations than the F/98 strain. The virus evF47 and rF/HA47 bound to chicken  
212 red blood cells treated with 4-fold higher  $\alpha$ 2-3,6,8 neuraminidase concentrations than  
213 F/98 strain. Compared to F/98 strain, the virus rF/HA<sub>M224K</sub> bound to red blood cells  
214 treated with 2-fold higher  $\alpha$ 2-3,6,8 neuraminidase concentrations, while the virus  
215 rF/HA<sub>S145N</sub> bound to chicken erythrocytes less avidly (Figure 3). In order to further  
216 confirm that S145N mutation decreased receptor binding avidity in these HA  
217 mutations, a recombinant “7+1” influenza virus rF/HA47 containing HA from the  
218 virus evF47 in F/98 backbone was generated. rF/HA47 possesses K131R, S145N,  
219 G181E, and A198V mutations in HA. Four recombinant viruses in rF/HA47 backbone  
220 were generated by introducing single HA mutation R131K, N145S, E181G and  
221 V198A, respectively, namely rF/HA<sub>489</sub> (S145N+G181E+A198V) (R131K in HA),  
222 rF/HA<sub>389</sub> (K131R+G181E+A198V) (N145S in HA), rF/HA<sub>349</sub>  
223 (K131R+S145N+A198V) (E181G in HA), and rF/HA<sub>348</sub> (K131R+S145N+G181E)  
224 (V198A in HA) (Table 1). As shown in Figure 4, the receptor binding avidity of the  
225 virus rF/HA<sub>389</sub>, rF/HA47 introducing the HA mutation N145S, was increased by  
226 8-fold compared with that of the virus rF/HA47, which was consistent with the result  
227 that S145N HA mutation caused the decrease of the receptor binding avidity, and the  
228 receptor binding avidity of the virus rF/HA<sub>348</sub>, V198A HA mutation introduced in  
229 rF/HA47, was decreased by 4-fold compared with that of the virus rF/HA47 (Figure  
230 3). These results indicated that the antigenic variants passaged in embryonated  
231 chicken eggs or chickens affected receptor binding avidity. The mutations A198V and  
232 Q234L significantly improved the receptor binding avidity, while the S145N mutation  
233 decreased the receptor binding avidity.

234 Although the mutation S145N or A198V affected the antigenicity of H9N2 virus,  
235 the A198V mutation increased the receptor binding avidity while the S145N mutation  
236 was the opposite to the A198V mutation for receptor binding avidity, which suggested  
237 the mechanism of S145N mutation for antigenic drift might be different from that of  
238 A198V mutation. Therefore, we selected the mutations S145N and A198V to further  
239 study on the escape mechanism from selective pressure exerted by inactivated vaccine  
240 induced antibodies.



241 **The S145N and A196V mutations used distinct mechanisms to escape from**  
242 **neutralizing-antibodies**

243 In order to study the roles of the mutations S145N and A198V in escape from  
244 neutralizing antibodies, microneutralization (MN) assay was performed, which was  
245 more sensitive than HI assay (23). In the cross-MN assay between the F/98 strain and  
246 the virus rF/HA<sub>S145N</sub>, the virus rF/HA<sub>S145N</sub> had 4-fold lower MN titer to the anti-F/98  
247 serum (Figure 4A), or even to the anti-rF/HA<sub>S145N</sub> serum (Figure 4B). The result  
248 suggested that the S145N mutation not only caused the virus rF/HA<sub>S145N</sub> escape from  
249 anti-F/98 serum, but also escape from anti-rF/HA<sub>S145N</sub> serum against itself. Antibody  
250 binding ELISA confirmed that the area under the curve (AUC) of anti-F/98 serum  
251 binding to the F/98 strain was 3.2-fold higher than that of anti-F/98 serum binding to  
252 the rF/HA<sub>S145N</sub> virus ( $P < 0.01$ ) (Figure 5A). The AUC of anti-rF/HA<sub>S145N</sub> serum  
253 binding to the rF/HA<sub>S145N</sub> virus was 2.3-fold higher than that of anti-rF/HA<sub>S145N</sub>  
254 serum binding to the F/98 virus ( $P < 0.001$ ) (Figure 5B). These results revealed that  
255 the anti-F/98 serum or anti-rF/HA<sub>S145N</sub> serum bound less efficiently to the rF/HA<sub>S145N</sub>  
256 virus than those to the F/98 virus. These data indicated that the S145N mutation  
257 promoted virus escape from pAbs by physically preventing virus-Ab binding.

258 In comparison to the F/98 strain, the rF/HA<sub>A198V</sub> virus exhibited 8-fold  
259 reduction of MN titers to anti-F/98 serum (Figure 4A), and 5.33-fold reduction of MN  
260 titers to homologous anti-rF/HA<sub>A198V</sub> serum (Figure 4C), which suggested that the  
261 A198V mutation promoted the rF/HA<sub>A198V</sub> virus escape from anti-F/98 and  
262 anti-rF/HA<sub>A198V</sub> serum. Antibody binding ELISA confirmed that the anti-F/98 serum  
263 bound similarly to either the F/98 virus or the rF/HA<sub>A198V</sub> virus (Figure. 5C), and  
264 anti-rF/HA<sub>A198V</sub> serum also bound similarly to either the F/98 virus or the rF/HA<sub>A198V</sub>  
265 virus (Figure 5D). Taken together, these data indicated that the A198V mutation  
266 promoted escape from pAb pressure by increasing viral receptor binding avidity, but  
267 not by preventing antibody binding physically.

268 **The mutations S145N and A198V reduced the protection efficiency of the**  
269 **corresponding inactivated vaccine**

270 The anti-sera against the whole inactivated vaccine of the virus F/98 or  
271 rF/HA<sub>S145N</sub> were generated in SPF chickens, and the HI assay was performed. The  
272 results showed that the average HI titer of the anti-F/98 serum against the F/98 strain  
273 was 1.83-fold higher than that against the rF/HA<sub>S145N</sub> virus ( $P < 0.05$ ). Average HI  
274 titer of anti-rF/HA<sub>S145N</sub> serum against the F/98 strain was 1.46-fold higher than that  
275 against the rF/HA<sub>S145N</sub> virus. The HI titers of serum from the chickens vaccinated with  
276 the rF/HA<sub>S145N</sub> virus were slightly lower than that from the chickens vaccinated with  
277 the F/98 virus (Figure 6A). These data suggested that the neutralizing antibody in  
278 serum induced by the inactivated vaccine of the rF/HA<sub>S145N</sub> virus was slightly lower  
279 than that induced by the inactivated vaccine of the paternal virus F/98. The protection  
280 test showed that the antibody induced by the F/98 vaccine could provide 100%  
281 protection against the challenge by either the F/98 virus or the rF/HA<sub>S145N</sub> virus. The  
282 antibody induced by the rF/HA<sub>S145N</sub> vaccine could provide 100% protection against  
283 the challenge by the F/98 virus, while 83.3% protection against the challenge by the  
284 rF/HA<sub>S145N</sub> virus (Table 2).

285 Additionally, the anti-F/98 serum against the F/98 virus was 15.3-fold higher  
286 than that against the rF/HA<sub>A198V</sub> virus ( $P < 0.001$ ); the anti-rF/HA<sub>A198V</sub> serum against  
287 the F/98 virus was 14.4-fold higher than that against the rF/HA<sub>A198V</sub> virus ( $P < 0.001$ );  
288 the HI titer of serum from the chickens vaccinated with rF/HA<sub>A198V</sub> virus were lower  
289 than that from the chickens vaccinated with F/98 virus (Figure 6B). These data  
290 demonstrated that the neutralizing-antibody in serum induced by the inactivated  
291 vaccine of the rF/HA<sub>A198V</sub> virus was lower than that induced by the inactivated  
292 vaccine of the F/98 virus. The immunogenic test showed that the antibody induced by  
293 the F/98 vaccine could provide 100% protection against the challenge by the F/98  
294 virus, and 83.3% protection against the challenge by the rF/HA<sub>A198V</sub> virus; while the  
295 antibody induced by the rF/HA<sub>A198V</sub> vaccine could provide 83.3% protection against  
296 the challenge by either the F/98 virus or the rF/HA<sub>A198V</sub> virus (Table 2).

297 Taken together, these results indicated that the mutations S145N and A198V  
298 both reduced the protective efficacy of H9N2 inactivated vaccine, and promoted  
299 H9N2 virus escape from antibody-based immune response.

300 **Discussion**

301 The adaptive evolution of H9N2 virus is determined by environment, genetic  
302 background and immune status, et al., resulting in introducing mutations into the viral  
303 genome of the H9N2 virus. As reported previously (21, 22), we found that the same  
304 four HA mutations occurred in the antigenic variants passaged in the 47<sup>th</sup> generation  
305 under selective pressure with vaccine antibodies, or in the 52<sup>nd</sup> generation under  
306 selective pressure without vaccine antibodies in SPF embryonated chicken eggs,  
307 respectively. Given that the lack of a strong immune system in embryonated chicken  
308 eggs and the presence of maternal antibodies mainly in the yolk and weakly in  
309 allantoic fluids led to the lack of sufficient immune pressure in the evolution of H9N2  
310 virus, which ensured that the evolution of H9N2 virus in embryonated chicken eggs  
311 almost independent and free from the selection pressure, and antigenic variants  
312 occurring in embryonated chicken eggs could completely escape neutralizing  
313 antibodies induced by the paternal virus F/98 in host. Additionally, 66.67% of the  
314 antigenic variants occurring in chickens under the selection pressure of vaccine  
315 antibody could escape from antibody-based selection *in vivo*, whereas only 16.7% of  
316 the antigenic variants occurring in chickens without the selection pressure of vaccine  
317 antibody. We speculated that the adaptive evolution of H9N2 virus reflected the  
318 results of the virus-host interaction process. H9N2 virus undergoing the selection of  
319 immune pressure in chickens would develop a symbiotic relationship with an  
320 appropriate escape strategy in the process of adaptive evolution. The presence of  
321 additional selection pressure of vaccine antibody would promote the host to restrict  
322 the infection and replication of H9N2 virus, while H9N2 virus would increase the  
323 immune escape to counteract specific antibodies binding.

324 HA is the most important antigenic protein of H9N2 virus, which stimulates host  
325 chicken to product the HA-specific neutralizing antibodies. HA mutations in antigenic  
326 sites promoted the virus to escape from antibody-based immune responses in host.  
327 Several studies reported HA mutations that affect the antigenic variation of H9N2  
328 virus. In these studies, HA mutations from different H9N2 antigenic variants are  
329 mainly located at or near the receptor binding sites in HA, most of which were

330 selected with HA-specific mAbs *in vitro* (7-13). Few studies on the HA mutations  
331 selected with pAbs driving from inactivated vaccine *in vivo* and the contribution of  
332 single HA mutation in H9N2 virus to antigenic variation or immune escape were  
333 reported. Here, the contribution of 15 HA mutations, occurring *in vivo*, to antigenic  
334 variation and immune escape were studied using HA genes from antigenic variants  
335 passaged with or without selection pressure of H9N2 inactivated vaccine as our  
336 previously reported (21, 22). We found that the HA mutations S145N, Q164L, A168T,  
337 A198V, M224K, and Q234L were responsible for the antigenic variation of H9N2  
338 virus. The A198V and Q234L mutations are at the receptor binding sites of HA. The  
339 mutations S145N, Q164L, A168T and M224K are near the receptor binding sites. The  
340 mutations S145N, Q164L and A168T have been reported when H9N2 virus were  
341 selected by either pAbs or mAbs *in vitro* (9-12). Our results also indicated that these  
342 mutations played an important role in the antigenic variation of H9N2 virus. The  
343 amino acid residues at the position 234 in HA from different H9N2 strains could be  
344 mutated under the selection pressures of either pAbs or mAbs *in vitro*, and the residue  
345 L234 was responsible to bind to human type  $\alpha$ 2,6 linked sialic acid receptors (24),  
346 suggesting the Q234L mutation occurred under selection pressure of vaccine  
347 antibodies increased the potential of F/98 strain to infect human. Although the HA  
348 mutation A198V has not been reported in antigenic mapping of HA of H9N2 virus  
349 using selection with HA-specific mAbs, about 90% of H9N2 wild viruses possess V  
350 or T at position 198 in HA (25), and the A198V mutation occurred in all of the  
351 passaged virus in this study, suggesting that the HA mutation A198V played a key role  
352 in the process of adaptive evolution of F/98 strain.

353 N-linked glycosylation (NLG) is a specific posttranslational modification of HA.  
354 Both NLG pattern and HA protein sequence determine the antigenic property of AIV  
355 (26). The NLG near the antigen epitope may shield the antigenic sites on the HA,  
356 causing immune escape by disturbing Abs recognition or blocking Abs binding (27,  
357 28), and the NLG near the receptor binding sites may change its receptor-binding  
358 properties and maintain viral fitness of the receptor binding activity (29-31). For  
359 example, the mutation K144N of PR8/H1N1 virus introduced a glycosylation site in

360 HA, and followed by the compensatory mutations D225G, N193K, or P186S that  
361 increased the receptor binding avidity (32). Naturally, the NLG at the position 145 in  
362 HA, which is present in about 10% of H9N2 isolates, is an important glycosylation  
363 site for H9N2 virus (33). In this study, the mutation S145N of the F/98 strain near the  
364 receptor binding sites of HA resulted in the addition of a glycosylation site, which  
365 shielded or interfered with the receptor sites and blocked Abs binding (9). The single  
366 S145N mutation decreased receptor binding activity, and promoted viral escape in  
367 MN or HI assays by preventing Ab binding. This finding revealed the molecular  
368 mechanism of the S145N mutation escaping from pAbs deriving from inactivated  
369 vaccine and its role in viral antigenic variation, which was not reported in the  
370 previous studies on the antigenic mutation in HA. In addition, the inactivated vaccine  
371 of the F/98 virus introduced single S145N mutation induced lower antibody level in  
372 serum, and could not provide 100% protection efficiency for its own virus rF/HA<sub>S145N</sub>.  
373 This is a new discovery of the immune escape strategy of the S145N mutation.

374 The receptor binding sites in HA of H9N2 virus include the residues at the  
375 position 109, 161, 163, 191, 198, 202 and 203, of which all are conservative except  
376 the residues at the position 198 (33). Sealy et al. investigated 55 H9N2 wild strains in  
377 Pakistan from 2014 to 2016, and found that the mutation A198V/T enhanced the  
378 receptor binding avidity of H9N2 virus (34). Herein, we demonstrated that the A198V  
379 mutation had the greatest effect on the antigenic variation of the F/98 virus among 15  
380 HA mutations from the passaged viruses. It increased the receptor binding avidity  
381 significantly and facilitated the virus rF/HA<sub>A198V</sub> to escape from the antibodies  
382 induced by the vaccine of the paternal virus F/98 or its own. Additionally, the  
383 inactivated vaccine of the rF/HA<sub>A198V</sub>, only introduced the A198V mutation in F/98  
384 virus, induced lower antibody levels in serum, and could not provide 100% protection  
385 efficiency against rF/HA<sub>A198V</sub>. These results might explain the phenomenon that  
386 homologous vaccine antibodies could not provide acceptable protection for  
387 vaccinated chicken flocks in recent years (6).

388 In summary, our finding revealed that the HA mutations occurring in the  
389 selection pressure with or without vaccine antibody affected antigenic variation of

390 H9N2 virus, including S145N, Q164L, A168T, A198V, M224K and Q234L, of which  
391 the mutation S145N or A198V significantly affected antigenic variation through  
392 different mechanisms. Further data showed that S145N substitution promoted viral  
393 escape from pAbs driving from vaccine by preventing Abs binding physically, while  
394 A198V substitution did promote H9N2 virus escape from pAbs-neutralizing reaction  
395 by enhancing the receptor binding activity. Additionally, both S145N and A198V  
396 mutations interfered with the immunogenicity of the inactivated vaccine, resulting in  
397 reduction of the protective efficiency of H9N2 inactivated vaccine, which contributed  
398 escape from the antibody-based immunity.

399

400

## 401 **Materials and methods**

### 402 *Ethical compliance*

403 The SPF chickens and chicken embryos used in this study were purchased from  
404 Nanjing Biology Medical Factory, Qian Yuan-hao Biological Co, Ltd.. Procedures  
405 involving the care and use of animals were approved by the Jiangsu Administrative  
406 Committee for Laboratory Animals (permission number SYXK 2016-0020) and  
407 performed in accordance with the Jiangsu Laboratory Animal Welfare and Ethics  
408 guidelines of the Jiangsu Administrative Committee of Laboratory Animals.

### 409 *Viruses and cells*

410 The H9N2 virus F/98 was isolated in Shanghai in 1998, stored at - 70 °C at the  
411 Animal Infectious Disease Laboratory, School of Veterinary Medicine, Yangzhou  
412 University. The GenBank accession numbers of the sequence of the F/98 strain are  
413 AY253750-AY253756 and AF461532 (35). Human embryonic kidney cells (293T)  
414 and Madin-Darby canine kidney (MDCK) cells, purchased from ATCC (Manassas,  
415 VA, USA), were maintained in Dulbecco's modified Eagle's medium (DMEM)  
416 (Sigma, St. Louis, MO, USA) supplemented with 10% fetal calf serum (Hyclone,  
417 South Logan, UT, USA) and were incubated at 37 °C with 5% CO<sub>2</sub>.

### 418 *Generation of H9N2 AIVs by reverse genetics*

419 The primers, synthesized by Tsingke Biological Technology (Nanjing, China),  
420 used to amplify the DNA sequence to add the single mutation in HA protein of F/98  
421 virus were designed using Primer 5.0 software (Primer-E Ltd., Plymouth, UK) based  
422 on the HA gene sequence of the F/98 H9N2 avian influenza virus. The full-length HA  
423 genes containing the single mutation was amplified by PCR, and inserted into a  
424 transcriptional/expression vector pHW2000 by using ClonExpress II One Step  
425 Cloning Kit (Vazyme Biotech Co., Ltd., Nanjing, China), resulting in the plasmids  
426 pHW204-HA145N. Seven dual-promoter plasmids, including pHW201-PB2,  
427 pHW202-PB1, pHW203-PA, pHW205-NP, pHW206-NA, pHW207-M, and  
428 pHW208-NS, from the F/98 virus strain possessing S145 HA, were stocked in our lab  
429 at -70 °C (36). The recombinant viruses were rescued by transfection in the 293T cell  
430 as previously described (37). Briefly, a total weight of 2.4 ng of the eight plasmids  
431 mixture with a rate of 1:1 was mixed with 100 µL Opti-MEM medium (GIBCO, BRL,  
432 Grand Island, USA). Next, 7 µL of PolyFect transfection reagent (QIAGEN,  
433 Duesseldorf, Germany) was added. The samples were incubated at room temperature  
434 for 10 min and then added to the 70-80% confluent monolayers of 293T cell in  
435 24-well plates. After incubation at 37°C with 5% CO<sub>2</sub> for 6 h, 2 µg/mL of  
436 TPCK-trypsin (Sigma, St. Louis, MO, USA) was added to the wells. Thirty hours  
437 after transfection, the supernatants were harvested and inoculated into 10-day-old SPF  
438 embryonated chicken eggs for virus propagation. The rescued virus was analyzed with  
439 a hemagglutinin assay, and the HA genes from the rescued virus was sequenced by  
440 Tsingke Biological Technology (Nanjing, China) to confirm the accuracy of the  
441 designed mutation.

#### 442 *Determination of the 50% tissue cell infectious dose (TCID<sub>50</sub>)*

443 The TCID<sub>50</sub> assay was performed as we described previously (37). Briefly, the  
444 viruses were diluted in DMEM without serum to a concentration of 10<sup>-1</sup> to 10<sup>-11</sup> and  
445 then added to MDCK cells in 96-well plates, respectively. After incubation at 37 °C  
446 with 5% CO<sub>2</sub> for 1 h, the supernatants were removed. The plates were washed twice  
447 with PBS, and then 100 µL of DMEM was added to each well. After incubation at

448 37°C with 5% CO<sub>2</sub> for 72 h, the HA titers of the cell supernatants were analyzed. The  
449 virus titers were calculated according to the Reed-Muench formula.

#### 450 *Anti-sera*

451 As described previously (25), six three-week-old SPF chickens were immunized  
452 twice by subcutaneous injection of 0.3 mL of oil-emulsion of inactivated whole virus  
453 vaccines of the viruses F/98, rF/HA<sub>S145N</sub> and rF/HA<sub>A198V</sub>, which were inactivated by  
454 adding 0.2% formalin (v/v) for 24 h at 37 °C, respectively. The antisera were collected  
455 and pooled from the vaccinated SPF chickens at three weeks after the vaccination.

#### 456 *Hemagglutinin-inhibition (HI) assay and Microneutralization (MN) assay*

457 Antisera were treated with cholera filtrate (Sigma-Aldrich, St. Louis, MO, USA)  
458 to remove nonspecific hemagglutination inhibitors before HI assay. HI assay was  
459 performed using 4 hemagglutination units (HAU) of H9N2 and 1% (v/v) chicken  
460 erythrocytes as we described previously (37).

461 MN assay was performed as previously described (38). Briefly, the sera were  
462 serially diluted with 100 TCID<sub>50</sub> virus and incubated at 37 °C with 5% CO<sub>2</sub> for 1 h.  
463 The serum-virus mixtures were added to MDCK cells and incubated for 1 h. After  
464 incubation, the serum-virus mixtures were removed. Serum-free DMEM containing  
465 2 µg/mL TPCK- trypsin was added to each cell and incubated at 37°C and 5% CO<sub>2</sub>.  
466 After 72 h of incubation, culture supernatant was mixed with equal volume of 1% (v/v)  
467 chicken erythrocytes to confirm the existence of hemagglutination by virus. The MN  
468 titer was defined as the highest dilution of serum with absence of hemagglutination.

#### 469 *Enzyme-linked immunosorbent assay (ELISA)*

470 ELISA assay was performed as we described previously (37). Sucrose  
471 gradient-purified viruses were diluted in PBS and added to Nunc-Immuno MaxiSop  
472 96-well plates (Corning, NY, USA) at 16 HAU per well. After incubation overnight at  
473 4°C, samples in wells were blocked with PBS-nonfat dry milk. Antisera against the  
474 F/98 virus, the rF/HA<sub>S145N</sub> virus or the rF/HA<sub>A198V</sub> virus in chickens were then added  
475 in serial twofold dilutions with PBS containing 0.05% Tween 20, respectively, and  
476 incubated for 3 h at 37 °C. After washing, goat anti chicken horseradish peroxidase  
477 antibody (Abcam, Cambridge, MA) was added and allowed to incubate for 1.5 h at



478 37 °C. After washing, TMB (3,3',5,5' Tetramethylbenzidine) (Sigma, St. Louis, MO,  
479 USA) substrate was added, and the reaction was stopped by adding H<sub>2</sub>SO<sub>4</sub>.  
480 Absorbance was recorded at 450 nm using an automated ELISA plate reader (model  
481 EL311SX; Biotek, Winooski, VT). The area under curve (AUC) of either virus was  
482 assessed for virus-Abs binding with GraphPad Prism 8 software (San Diego, CA)  
483 above that of the corresponding negative control.

#### 484 *Receptor binding assay*

485 Receptor binding assay was performed as previously described (39). Briefly, the  
486 chicken erythrocytes were pretreated with different amounts of  $\alpha$ 2-3,6,8  
487 neuraminidase (New England Biolabs, Beverly, MA, USA) for 1 h at 37 °C. The  
488 chicken erythrocytes were washed with PBS and added (as 1% (v/v) solutions) to 4  
489 HAU of each virus (as determined using nontreated chicken erythrocytes).  
490 Agglutination was measured after incubation for 1 hour. Virus with higher receptor  
491 binding avidity is able to bind to chicken erythrocytes that are treated with high  
492 amounts of  $\alpha$ 2-3,6,8 neuraminidase.

#### 493 *Chicken experiments*

494 i) A total of 30 three-week-old SPF chickens vaccinated with the whole  
495 inactivated F/98 virus were divided into five groups: the F/98 challenge group, the  
496 evF47 challenge group, the enF52 challenge group, the cvF20 challenge group, and  
497 the cnF20 challenge group. Each group has 6 chickens. At day 21 post-vaccination,  
498 each group was challenged intranasally and intratracheally with 10<sup>6</sup> EID<sub>50</sub> of the  
499 corresponding virus. ii) A total of 42 three-week-old SPF chickens were divided into  
500 three groups: the F/98 vaccine group including 18 chickens, the rF/HA<sub>S145N</sub> vaccine  
501 group including 12 chickens, and the rF/HA<sub>A198V</sub> vaccine group including 12 chickens,  
502 which were immunized with the emulsion vaccine of the F/98 virus, the rF/HA<sub>S145N</sub>  
503 virus, and the rF/HA<sub>A198V</sub> virus, respectively. At day 21 post-vaccination, chickens  
504 were bled from the wing vein for sera, and HI reactions against the F/98 virus, the  
505 rF/HA<sub>S145N</sub> virus or the rF/HA<sub>A198V</sub> virus was performed, respectively. Then, six  
506 chickens from each group were challenged intranasally and intratracheally with 10<sup>6</sup>  
507 EID<sub>50</sub> of the F/98 virus, the rF/HA<sub>S145N</sub> virus or the rF/HA<sub>A198V</sub> virus. Chickens were

508 monitored daily for morbidity and mortality after challenge. At days 3 and 5  
509 post-challenge, tracheal and cloacal swabs from challenged chickens were collected in  
510 1 mL of PBS containing antibiotics. After one freeze-thaw cycle, the swabs were  
511 centrifuged at 3000 rpm for 10 min. A 0.2 mL supernatant was taken to inoculate  
512 10-day-old SPF chicken eggs. Viral shedding in the trachea and cloacal was evaluated  
513 via HA titers of the allantoic cavity of SPF chicken eggs at day 5 post-inoculated  
514 according to the standard of  $HA \geq 2^3$ .

#### 515 *Statistics analysis*

516 Data were shown as the mean  $\pm$  SD for all assays. The Student's t test analysis  
517 was used to compare between different groups and analyzed with GraphPad Prism 8  
518 software. Differences were considered statistically significant when a *P* value was  
519  $<0.05$ .

520

521 **Funding:** This research was funded by the National Natural Science Foundation of  
522 China (32172802, 31672516, 31172300, 30670079), supported by the Grant No.  
523 BE2016343 from Jiangsu province, the Jiangsu University and College Natural  
524 Science Foundation (12KJA230002), the Doctoral Program of Higher Education of  
525 China (20133250110002) and a project funded by the Priority Academic Program  
526 Development of Jiangsu Higher Education Institutions (PAPD).

527 **Conflicts of Interest:** All the authors have declared that no conflicts of interest exist  
528 regarding to the publication of the data in this manuscript.

529

530

531

## References:

- 532 1. **Gu M, Xu L, Wang X, Liu X.** 2017. Current situation of H9N2 subtype avian influenza in China.  
533 *Vet Res* **48**:49.
- 534 2. **Li C, Yu K, Tian G, Yu D, Liu L, Jing B, Ping J, Chen H.** 2005. Evolution of H9N2 influenza  
535 viruses from domestic poultry in Mainland China. *Virology* **340**:70-83.
- 536 3. **Sun Y, Liu J.** 2015. H9N2 influenza virus in China: a cause of concern. *Protein Cell* **6**:18-25.
- 537 4. **Jin X, Zha Y, Hu J, Li X, Chen J, Xie S, Dai Y, Li Z, Wang X, Wang F, Qi W, Liao M, Jia**  
538 **W.** 2020. New molecular evolutionary characteristics of H9N2 avian influenza virus in Guangdong  
539 Province, China. *Infect Genet Evol* **77**:104064.
- 540 5. **Chambers TM, Kawaoka Y, Webster RG.** 1988. Protection of chickens from lethal influenza  
541 infection by vaccinia-expressed hemagglutinin. *Virology* **167**:414-421.
- 542 6. **Li Y, Liu M, Sun Q, Zhang H, Zhang H, Jiang S, Liu S, Huang Y.** 2019. Genotypic evolution  
543 and epidemiological characteristics of H9N2 influenza virus in Shandong Province, China. *Poult Sci*  
544 **98**:3488-3495.
- 545 7. **Jin F, Dong X, Wan Z, Ren D, Liu M, Geng T, Zhang J, Gao W, Shao H, Qin A, Ye J.** 2019.  
546 A single mutation N166D in hemagglutinin affects antigenicity and pathogenesis of H9N2 avian  
547 influenza virus. *Viruses* **11**.
- 548 8. **Okamatsu M, Sakoda Y, Kishida N, Isoda N, Kida H.** 2008. Antigenic structure of the  
549 hemagglutinin of H9N2 influenza viruses. *Arch Virol* **153**:2189-2195.
- 550 9. **Ping J, Li C, Deng G, Jiang Y, Tian G, Zhang S, Bu Z, Chen H.** 2008. Single-amino-acid  
551 mutation in the HA alters the recognition of H9N2 influenza virus by a monoclonal antibody. *Biochem*  
552 *Biophys Res Commun* **371**:168-171.
- 553 10. **Kaverin NV, Rudneva IA, Ilyushina NA, Lipatov AS, Krauss S, Webster RG.** 2004.  
554 Structural differences among hemagglutinins of influenza A virus subtypes are reflected in their  
555 antigenic architecture: analysis of H9 escape mutants. *J Virol* **78**:240-249.
- 556 11. **Wan Z, Ye J, Xu L, Shao H, Jin W, Qian K, Wan H, Qin A.** 2014. Antigenic mapping of the  
557 hemagglutinin of an H9N2 avian influenza virus reveals novel critical amino acid positions in antigenic  
558 sites. *J Virol* **88**:3898-3901.
- 559 12. **Zhu Y, Yang D, Ren Q, Yang Y, Liu X, Xu X, Liu W, Chen S, Peng D, Liu X.** 2015.  
560 Identification and characterization of a novel antigenic epitope in the hemagglutinin of the escape  
561 mutants of H9N2 avian influenza viruses. *Vet Microbiol* **178**:144-149.
- 562 13. **Peacock T, Reddy K, James J, Adamiak B, Barclay W, Shelton H, Iqbal M.** 2016. Antigenic  
563 mapping of an H9N2 avian influenza virus reveals two discrete antigenic sites and a novel mechanism  
564 of immune escape. *Sci Rep* **6**:18745.
- 565 14. **Cherry JL, Lipman DJ, Nikolskaya A, Wolf YI.** 2009. Evolutionary dynamics of  
566 N-glycosylation sites of influenza virus hemagglutinin. *PLoS Curr* **1**:N1001.
- 567 15. **An Y, Parsons LM, Jankowska E, Melnyk D, Joshi M, Cipollo JF.** 2019. N-glycosylation of  
568 seasonal influenza vaccine hemagglutinins: implication for potency testing and immune processing.
- 569 16. **Li Y, Bostick DL, Sullivan CB, Myers JL, Griesemer SB, StGeorge K, Plotkin JB, Hensley**  
570 **SE.** 2013. Single hemagglutinin mutations that alter both antigenicity and receptor binding avidity  
571 influence influenza virus antigenic clustering.
- 572 17. **Peacock TP, Benton DJ, Sadeyen JR, Chang P, Sealy JE, Bryant JE, Martin SR, Shelton H,**

- 573 **McCauley JW, Barclay WS, Iqbal M.** 2017. Variability in H9N2 haemagglutinin receptor-binding  
574 preference and the pH of fusion. *Emerg Microbes Infect* **6**:e11.
- 575 18. **Teng Q, Xu D, Shen W, Liu Q, Rong G, Li X, Yan L, Yang J, Chen H, Yu H, Ma W, Li Z.**  
576 2016. A single mutation at position 190 in hemagglutinin enhances binding affinity for human type  
577 sialic acid receptor and replication of H9N2 avian influenza virus in mice. *J Virol* **90**:9806-9825.
- 578 19. **Yang W, Punyadarsaniya D, Lambertz RLO, Lee DCC, Liang CH, Höper D, Leist SR,**  
579 **Hernández-Cáceres A, Stech J, Beer M, Wu CY, Wong CH, Schughart K, Meng F, Herrler G.**  
580 2017. Mutations during the adaptation of H9N2 avian influenza virus to the respiratory epithelium of  
581 pigs enhance sialic acid binding activity and virulence in mice. *J Virol* **91**.
- 582 20. **Wan H, Perez DR.** 2007. Amino acid 226 in the hemagglutinin of H9N2 influenza viruses  
583 determines cell tropism and replication in human airway epithelial cells. *J Virol* **81**:5181-5191.
- 584 21. **Jin H, Wang W, Yang X, Su H, Fan J, Zhu R, Wang S, Shi H, Liu X.** 2018. Evolution of  
585 H9N2 avian influenza virus in embryonated chicken eggs with or without homologous vaccine  
586 antibodies. *Bmc Vet Res* **14**:71.
- 587 22. **Su H, Zhao Y, Zheng L, Wang S, Shi H, Liu X.** 2020. Effect of the selection pressure of  
588 vaccine antibodies on evolution of H9N2 avian influenza virus in chickens. *Amb Express* **10**:98.
- 589 23. **Segovia KM, Franca MS, Bahnson CS, Latorre-Margalef N, Stalknecht DE.** 2019. Are  
590 microneutralization and hemagglutination inhibition assays comparable? Serological results from  
591 influenza experimentally infected mallard ducks.
- 592 24. **Wan H, Perez DR.** 2007. Amino acid 226 in the hemagglutinin of H9N2 influenza viruses  
593 determines cell tropism and replication in human airway epithelial cells. *J Virol* **81**:5181-5191.
- 594 25. **Zhu R, Xu D, Yang X, Zhang J, Wang S, Shi H, Liu X.** 2018. Genetic and biological  
595 characterization of H9N2 avian influenza viruses isolated in China from 2011 to 2014. *Plos One*  
596 **13**:e199260.
- 597 26. **Tate MD, Job ER, Deng YM, Gunalan V, Maurer-Stroh S, Reading PC.** 2014. Playing hide  
598 and seek: how glycosylation of the influenza virus hemagglutinin can modulate the immune response  
599 to infection. *Viruses* **6**:1294-1316.
- 600 27. **Medina RA, Stertz S, Manicassamy B, Zimmermann P, Sun X, Albrecht RA, Uusi-Kerttula**  
601 **H, Zagordi O, Belshe RB, Frey SE, Tumpey TM, Garcia-Sastre A.** 2013. Glycosylations in the  
602 globular head of the hemagglutinin protein modulate the virulence and antigenic properties of the  
603 H1N1 influenza viruses. *Sci Transl Med* **5**:170r-187r.
- 604 28. **Lisowska E.** 2002. The role of glycosylation in protein antigenic properties. *Cell Mol Life Sci*  
605 **59**:445-455.
- 606 29. **Wang CC, Chen JR, Tseng YC, Hsu CH, Hung YF, Chen SW, Chen CM, Khoo KH, Cheng**  
607 **TJ, Cheng YS, Jan JT, Wu CY, Ma C, Wong CH.** 2009. Glycans on influenza hemagglutinin affect  
608 receptor binding and immune response. *Proc Natl Acad Sci U S A* **106**:18137-18142.
- 609 30. **de Vries RP, de Vries E, Bosch BJ, de Groot RJ, Rottier PJ, de Haan CA.** 2010. The  
610 influenza A virus hemagglutinin glycosylation state affects receptor-binding specificity. *Virology*  
611 **403**:17-25.
- 612 31. **Kosik I, Ince WL, Gentles LE, Oler AJ, Kosikova M, Angel M, Magadan JG, Xie H, Brooke**  
613 **CB, Yewdell JW.** 2018. Influenza A virus hemagglutinin glycosylation compensates for antibody  
614 escape fitness costs. *Plos Pathog* **14**:e1006796.
- 615 32. **Das SR, Hensley SE, David A, Schmidt L, Gibbs JS, Puigbo P, Ince WL, Bennink JR,**  
616 **Yewdell JW.** 2011. Fitness costs limit influenza A virus hemagglutinin glycosylation as an immune

- 617 evasion strategy. *Proc Natl Acad Sci U S A* **108**:E1417-E1422.
- 618 33. **Zhu R, Xu D, Yang X, Zhang J, Wang S, Shi H, Liu X.** 2018. Genetic and biological  
619 characterization of H9N2 avian influenza viruses isolated in China from 2011 to 2014. *Plos One*  
620 **13**:e199260.
- 621 34. **Sealy JE, Yaqub T, Peacock TP, Chang P, Ermetal B, Clements A, Sadeyen JR, Mehboob A,**  
622 **Shelton H, Bryant JE, Daniels RS, McCauley JW, Iqbal M.** 2018. Association of increased  
623 receptor-binding avidity of influenza A(H9N2) viruses with escape from antibody-based immunity and  
624 enhanced zoonotic potential. *Emerg Infect Dis* **25**:63-72.
- 625 35. **Lu JH, Liu XF, Shao WX, Liu YL, Wei DP, Liu HQ.** 2005. Phylogenetic analysis of eight  
626 genes of H9N2 subtype influenza virus: a mainland China strain possessing early isolates' genes that  
627 have been circulating. *Virus Genes* **31**:163-169.
- 628 36. **Shi H, Ashraf S, Gao S, Lu J, Liu X.** 2010. Evaluation of transmission route and replication  
629 efficiency of H9N2 avian influenza virus. *Avian Dis* **54**:22-27.
- 630 37. **Peng Q, Zhu R, Wang X, Shi H, Bellefleur M, Wang S, Liu X.** 2019. Impact of the variations  
631 in potential glycosylation sites of the hemagglutinin of H9N2 influenza virus. *Virus Genes* **55**:182-190.
- 632 38. **Zhu H, Lee A, Li C, Mak W, Chen YY, Chan KH, Zhang A, Fung WF, Zhang RQ, Fung YF,**  
633 **Poon R, Lam JY, Tam S, Hung I, Chen H, Yuen KY, To K.** 2018. Low population serum  
634 microneutralization antibody titer against the predominating influenza A(H3N2) N121K virus during  
635 the severe influenza summer peak of Hong Kong in 2017. *Emerg Microbes Infect* **7**:23.
- 636 39. **Chambers BS, Parkhouse K, Ross TM, Alby K, Hensley SE.** 2015. Identification of  
637 Hemagglutinin Residues Responsible for H3N2 Antigenic Drift during the 2014-2015 Influenza Season.  
638 *Cell Rep* **12**:1-6.
- 639  
640  
641  
642  
643  
644  
645  
646  
647  
648  
649  
650  
651  
652  
653  
654  
655  
656  
657

658  
659

Table 1 The characterization and HA mutations of the H9N2 viruses used in this study

| Strain                 | Characterization                                                                                                         | Mutations in HA            |
|------------------------|--------------------------------------------------------------------------------------------------------------------------|----------------------------|
| F/98                   | Wild type                                                                                                                |                            |
| evF47                  | 47 <sup>th</sup> generation under vaccine antibodies in SPF chicken embryonated eggs                                     | K131R, S145N, G181E, A198V |
| enF52                  | 52 <sup>nd</sup> generation without vaccine antibodies in SPF embryonated chicken eggs                                   | K131R, S145N, G181E, A198V |
| cvF20                  | 20 <sup>th</sup> generation with vaccine antibodies in SPF chicken                                                       | K131R, A198V, Q234L        |
| cnF20                  | 20 <sup>th</sup> generation without vaccine antibodies in SPF chicken                                                    | A168T, A198V, M224K        |
| rF/HA <sub>K131R</sub> | The recombinant virus containing single HA mutation from evF47 or cvF20 in F/98 backbone                                 | K131R                      |
| rF/HA <sub>S145N</sub> | The recombinant virus containing single HA mutation from evF47 in F/98 backbone                                          | S145N                      |
| rF/HA <sub>G181E</sub> | The recombinant virus containing single HA mutation from enF52, evF47, cnF20 or cvF20 in F/98 backbone                   | G181E                      |
| rF/HA <sub>A198V</sub> |                                                                                                                          | A198V                      |
| rF/HA <sub>348</sub>   |                                                                                                                          | K131R, S145N, G181E,       |
| rF/HA <sub>349</sub>   |                                                                                                                          | K131R, S145N, A198V        |
| rF/HA <sub>389</sub>   | The recombinant virus containing multiple HA mutation from evF47 in F/98 backbone                                        | K131R, G181E, A198V        |
| rF/HA <sub>489</sub>   |                                                                                                                          | S145N, G181E, A198V        |
| rF/HA47                |                                                                                                                          | K131R, S145N, G181E, A198V |
| rF/HA <sub>A168T</sub> | The recombinant virus containing single HA mutation from enF20 in F/98 backbone                                          | A168T                      |
| rF/HA <sub>M224K</sub> |                                                                                                                          | M224K                      |
| rF/HA <sub>Q234L</sub> | The recombinant virus containing single HA mutation from evF20 in F/98 backbone                                          | Q234L                      |
| rF/HA <sub>Q133H</sub> |                                                                                                                          | Q133H                      |
| rF/HA <sub>Q164L</sub> |                                                                                                                          | Q164L                      |
| rF/HA <sub>Y264H</sub> |                                                                                                                          | Y264H                      |
| rF/HA <sub>G270R</sub> | The recombinant virus containing single HA mutation from the other quasispecies passaged in SPF chicken in F/98 backbone | G270R                      |
| rF/HA <sub>G274R</sub> |                                                                                                                          | G274R                      |
| rF/HA <sub>K278E</sub> |                                                                                                                          | K278E                      |
| rF/HA <sub>I386V</sub> |                                                                                                                          | I386V                      |
| rF/HA <sub>K399N</sub> |                                                                                                                          | K399N                      |

660  
661

662

663

664

Table 2 Virus shedding from the swabs on days 3 and 5 post challenged with F/98, rF/HA<sub>S145N</sub> or rF/HA<sub>A198V</sub> viruses

| Group                                                           | Virus shedding#  |                  | Protection (%) |
|-----------------------------------------------------------------|------------------|------------------|----------------|
|                                                                 | D3               | D5               |                |
| Chickens vaccinated the F/98 inactive vaccine                   |                  |                  |                |
| Challenged with F/98 virus                                      | 0/6 <sup>a</sup> | 0/6 <sup>a</sup> | 100            |
| Challenged with rF/HA <sub>A198V</sub> virus                    | 1/6 <sup>a</sup> | 0/6 <sup>a</sup> | 83.3           |
| Challenged with rF/HA <sub>S145N</sub> virus                    | 0/6 <sup>a</sup> | 0/6 <sup>a</sup> | 100            |
| Chickens vaccinated the rF/HA <sub>A198V</sub> inactive vaccine |                  |                  |                |
| Challenged with F/98 virus                                      | 1/6 <sup>a</sup> | 0/6 <sup>a</sup> | 83.3           |
| Challenged with rF/HA <sub>A198V</sub> virus                    | 1/6 <sup>a</sup> | 0/6 <sup>a</sup> | 83.3           |
| Chickens vaccinated the rF/HA <sub>S145N</sub> inactive vaccine |                  |                  |                |
| Challenged with F/98 virus                                      | 0/6 <sup>a</sup> | 0/6 <sup>a</sup> | 100            |
| Challenged with rF/HA <sub>S145N</sub> virus                    | 1/6 <sup>a</sup> | 0/6 <sup>a</sup> | 83.3           |

665

# Data are numbers of chickens shedding virus/total number of chickens at days 3 and 5.

666

Positive sample of chickens shedding virus indicated higher than the detection limit of 2<sup>2</sup> HA titer.

667

Protection was calculated with data on day 3. The appearance of the same letter means that there is

668

no marked difference among the groups under the condition of  $P > 0.05$ .

669

670

671 Figure legends:

672

Figure 1. Protection efficiency of the whole inactivated F/98 vaccine against the antigen variant

673

viruses passaged in SPF embryonated chicken eggs or in the chickens with or without homologous

674

vaccine antibodies. The negative sample of chickens shedding virus from the swabs on 3 days post

675

challenged with a specific virus indicated that the HA titer lower than the detection limit of 2<sup>2</sup>.

676

Each group had six chickens. The appearance of the same letter means that there is no marked

677

difference among the groups under the condition of  $P > 0.05$ .

678

679

680

Figure 2. (A) The location of amino acid mutations in the three-dimensional structure of HA

681

protein of H9N2 subtype avian influenza virus. A. Yellow color indicates the locations of the HA

682

receptor binding sites including the positions 146-150, 109, 161, 163, 191, 198, 202, 203, and

683

232-237. Pink color indicates mutations on antigenic sites that have been reported. Red color

684

indicates mutations that have not been previously reported as antigenic sites. (B) HI titers of F/98

685

immune sera from chickens (n=8) to each recombinant virus with single or multiple mutants in

686

HA from the passaged viruses occurred in the 47th generation in embryonated chicken eggs under

687 selective pressure on antibodies. (C) HI titers of F/98 immune sera from chickens (n=8) to the  
688 recombinant virus with each single mutant in HA from the quasispecies occurred in the chickens  
689 under the selection pressure of vaccine antibodies. A  $\geq 4$ -fold change in HI titers of standard  
690 antiserum was considered as significant antigenic change.

691

692 Figure 3. HA mutations A198V, M224K, Q234L increase receptor binding avidity of H9N2 virus  
693 F/98, whereas S145N decreases receptor binding avidity. And the evolution of F/98 strain in  
694 chicken embryos or chickens with homologous vaccine antibodies resulted in the increase of  
695 receptor binding avidity. Relative viral receptor binding avidities were determined by  
696 hemagglutination of red blood cells pretreated with increasing amounts of  $\alpha 2$ -3,6,8  
697 neuraminidase. Data are expressed as the maximal amount of neuraminidase that allowed full  
698 agglutination. The data are representative of three independent experiments.

699

700

701 Figure 4. HA S145N or A198V mutation results in a decrease in MN titer. (A) MN titers of F/98  
702 immune sera from chickens (n=8) to the viruses F/98, rF/HA<sub>S145N</sub>, and rF/HA<sub>A198V</sub>. (B) MN titers  
703 of rF/HA<sub>S145N</sub> immune sera from chickens (n=8) to the viruses F/98 and rF/HA<sub>S145N</sub>. (C) MN titers  
704 of rF/HA<sub>A198V</sub> immune sera from chickens (n=8) to the viruses F/98 and rF/HA<sub>A198V</sub>. A  $\geq 4$ -fold  
705 change in MN titers of standard antiserum was considered as significant antigenic change.

706

707

708 Figure 5. Single S145N mutation physically prevents Ab binding, whereas single A198V mutation  
709 does not affect Ab binding. Direct antibody binding to F/98 or rF/HA<sub>A198V</sub> viruses were  
710 determined by ELISA using sera collected from chickens vaccinated with inactivated F/98 (A) or  
711 rF/HA<sub>A198V</sub> (B). Direct antibody binding to F/98 or rF/HA<sub>S145N</sub> viruses were determined by ELISA  
712 using sera collected from chickens vaccinated with inactivated F/98 (C) or rF/HA<sub>S145N</sub> (D). The  
713 AUC of ELISA was calculated for virus-Abs binding by GraphPad Prism 8 software above the  
714 value of the corresponding negative control, which was performed under the same conditions.  
715 Means and SD from three independent experiments. Statistical significance was based on student's  
716 t test (\*\* $P < 0.01$ ; \*\*\* $P < 0.001$ ). O.D., optical density.

717



718

719 Figure 6. Single S145N mutation or single A198V mutation resulted in low HI reaction for  
720 chicken serum. Three-week-old SPF chickens were vaccinated once by subcutaneous injection of  
721 0.3 mL of oil-emulsion of inactivated whole virus vaccines of the viruses F/98, rF/HA<sub>S145N</sub>, and  
722 rF/HA<sub>A198V</sub>, respectively. At 21 d.p.v., twelve chickens from each group (the F/98 vaccine group,  
723 the rF/HA<sub>S145N</sub> vaccine group, and the rF/HA<sub>A198V</sub> vaccine group) were bled to analyze cross-HI  
724 titers against the F/98 and rF/HA<sub>S145N</sub> viruses (A), or against the F/98 and rF/HA<sub>A198V</sub> viruses (B).  
725 Statistical significance was based on student's t test (\* $p < 0.05$ ).

726

727

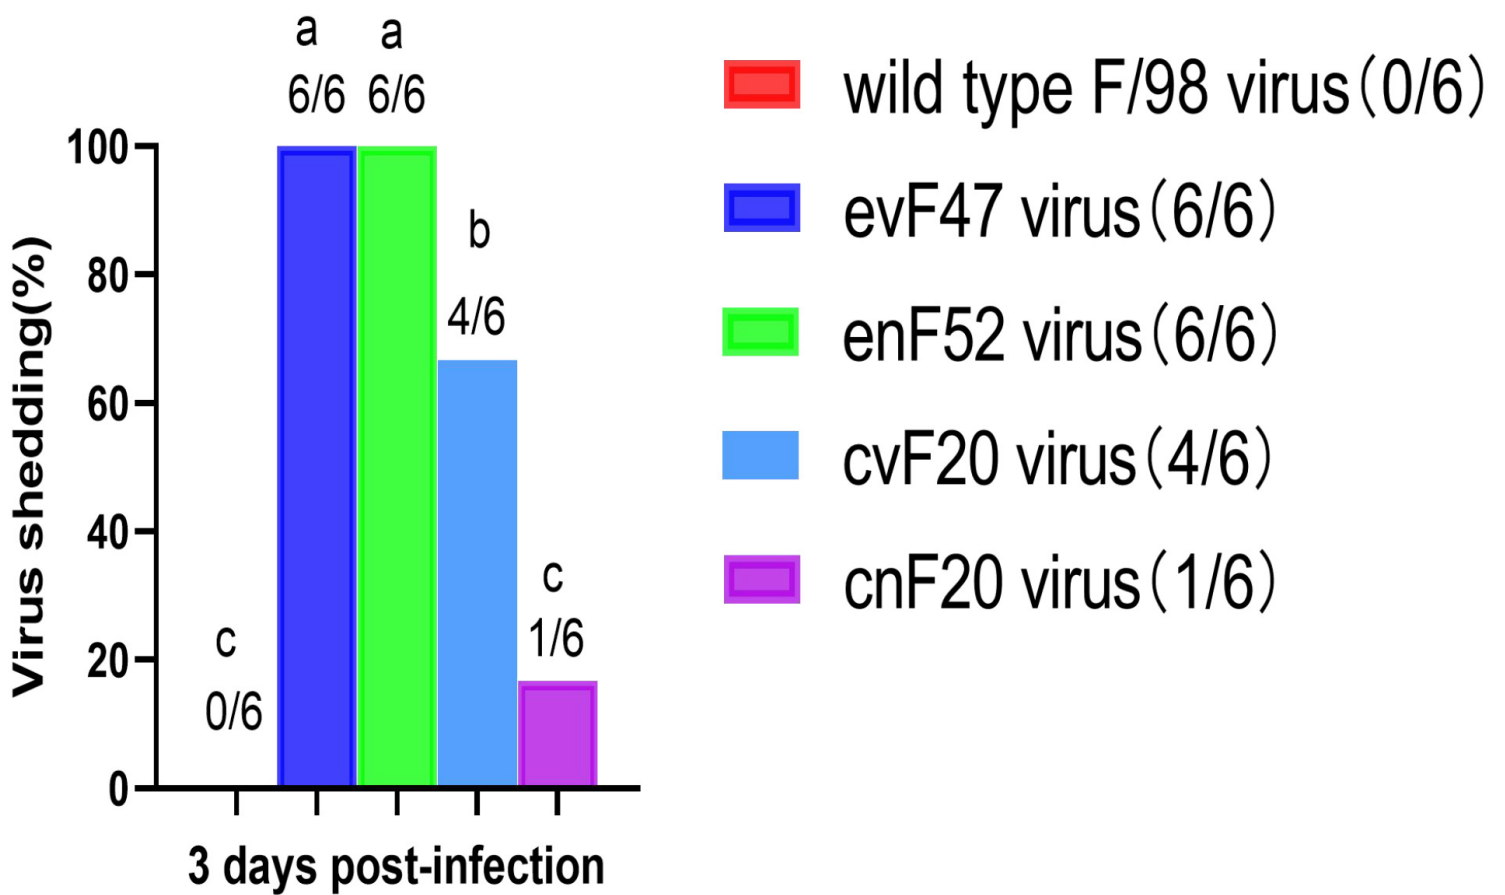

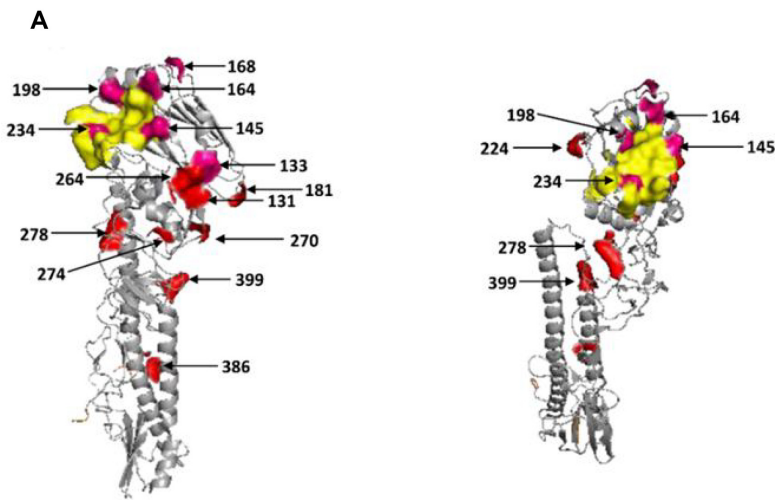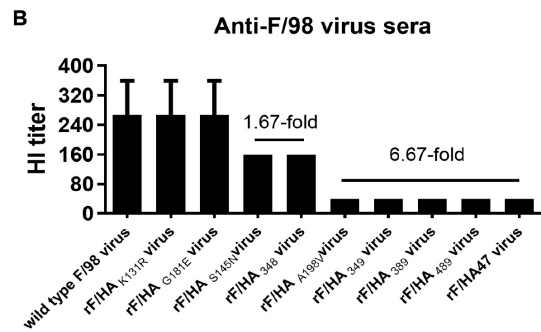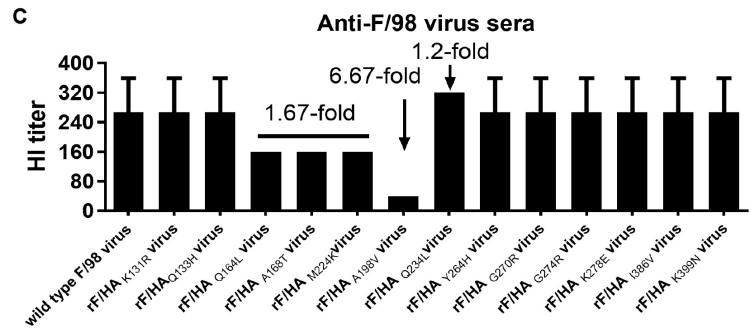

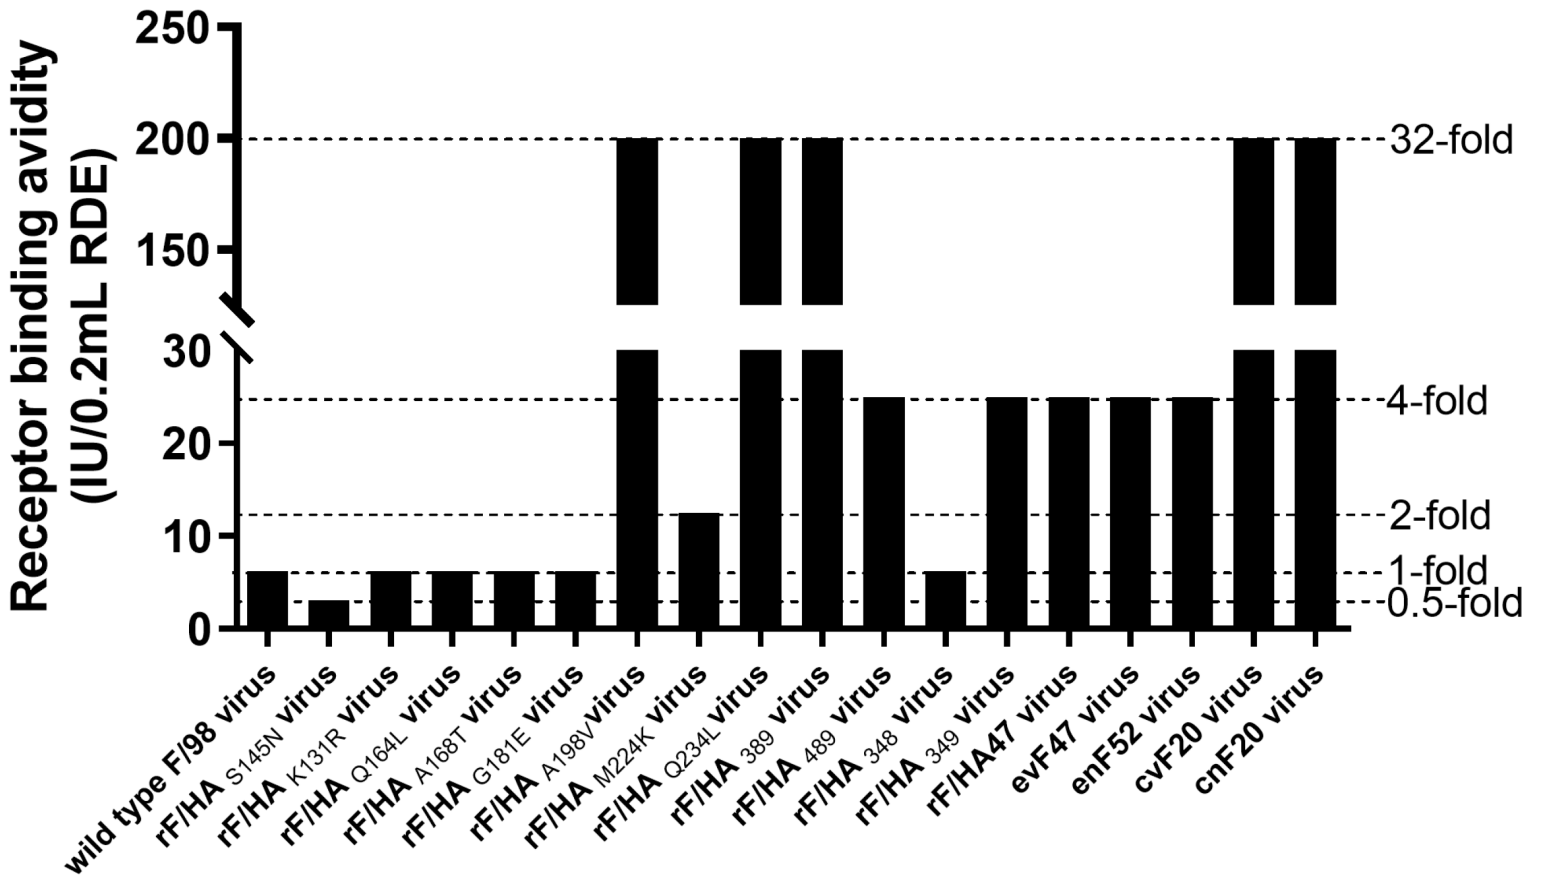

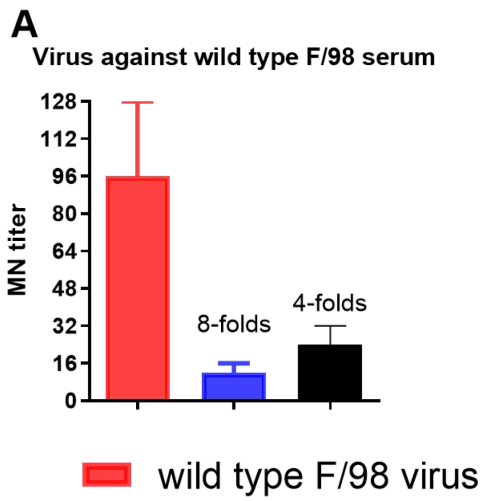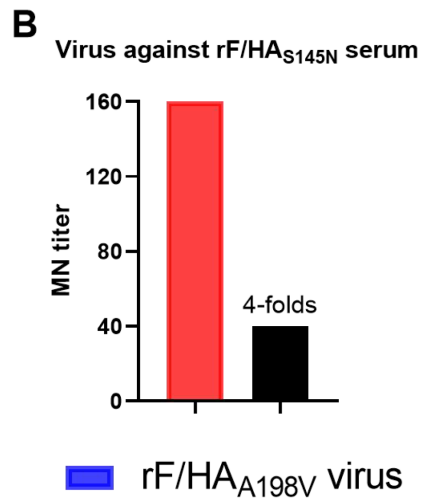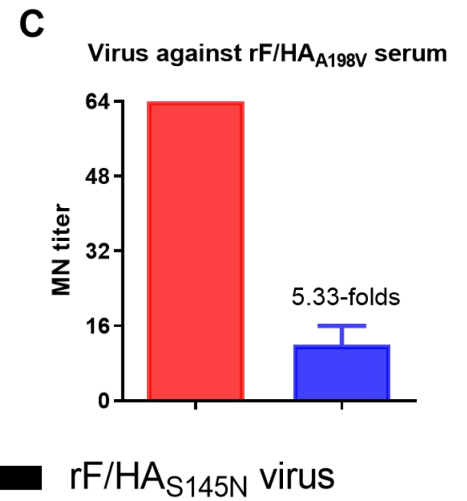

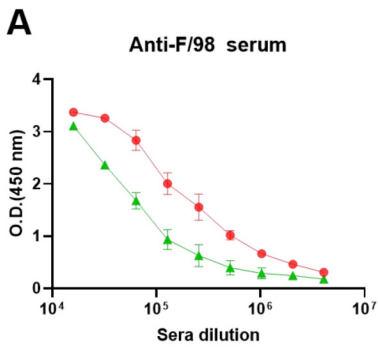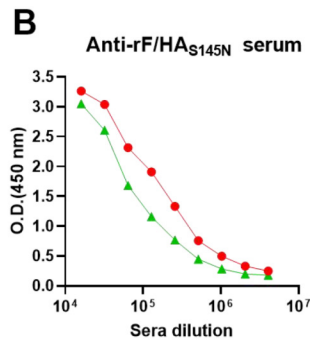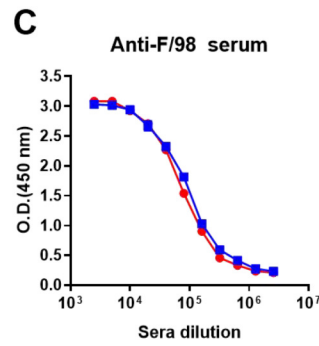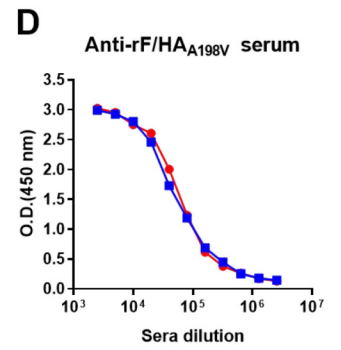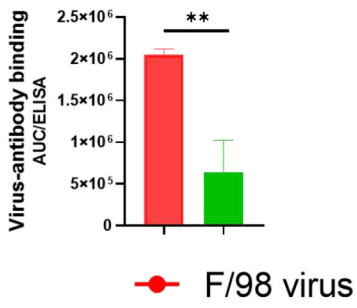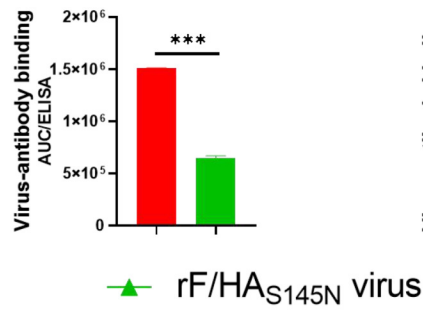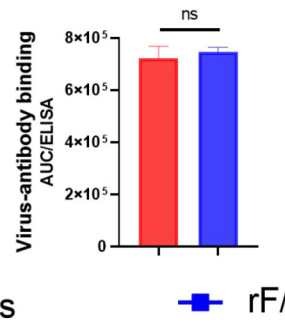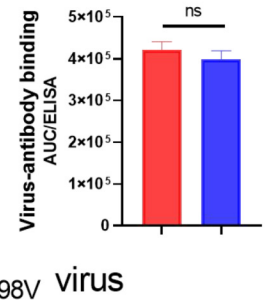

**A**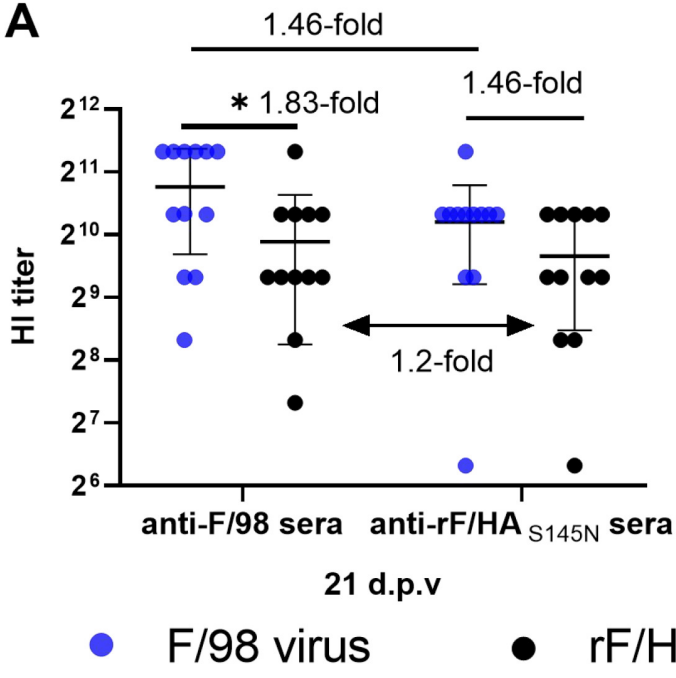**B**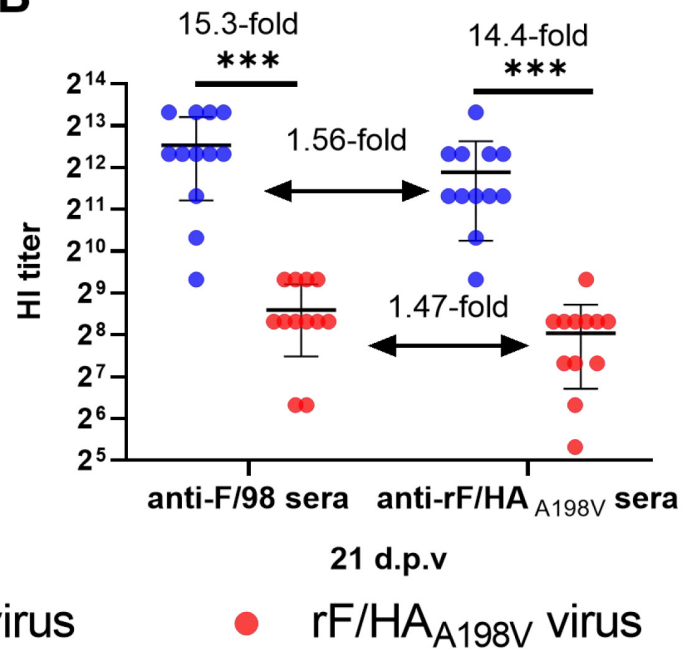

Source: http://biorxiv.org/content/10.1101/2021.09.07.459361v1.full.pdf
